# Supplementary material
Source: MDPI journal article supplement (https://www.mdpi.com/2073-4344/13/3/518)

## Supplementary Material

### Continuous flow photochemical synthesis of 3-methyl-4-arylmethylene isoxazole-5(4H)-ones by Organic Photoredox Catalysis and investigation of their larvicidal activity.

Ana Beatriz S. Sampaio, Mônica Shigemi S. Mori, Lorena C. Albernaz, Laila S. Espindola, Carlos Eduardo M. Salvador and Carlos Kleber Z. Andrade

|    |                                                    |    |
|----|----------------------------------------------------|----|
| 01 | Experimental set-up.....                           | 01 |
|    | Light sources.....                                 | 01 |
|    | Photochemical chamber .....                        | 02 |
|    | Set-up.....                                        | 02 |
|    | FEP reactor.....                                   | 02 |
|    | Continuous flow reactor.....                       | 03 |
|    | Input and output of the photochemical reactor..... | 03 |
| 02 | Larvicidal test                                    | 04 |
| 03 | Spectral Data.....                                 | 05 |

### Experimental set-up

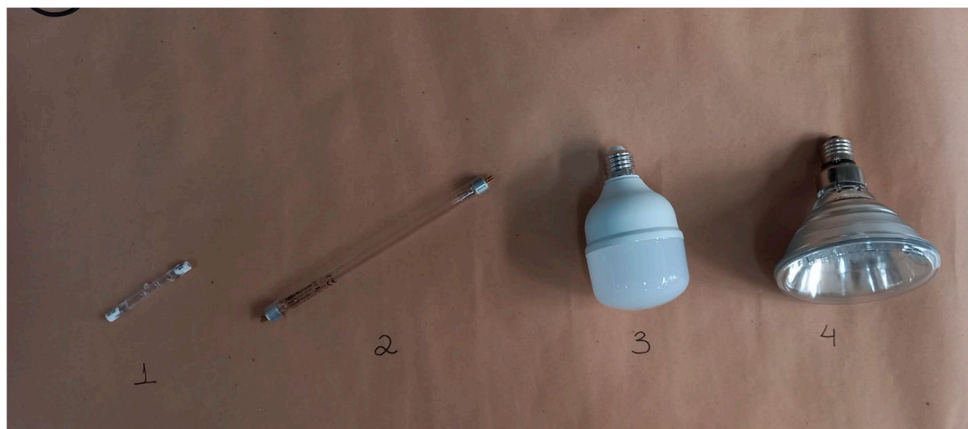

**Figure S1.** Light sources - (1) 150 W Halogen Lamp. (2) 6W UV-vis Lamp. (3) 30W High Intensity White LED Lamp. (4) 12W Blue LED Lamp.

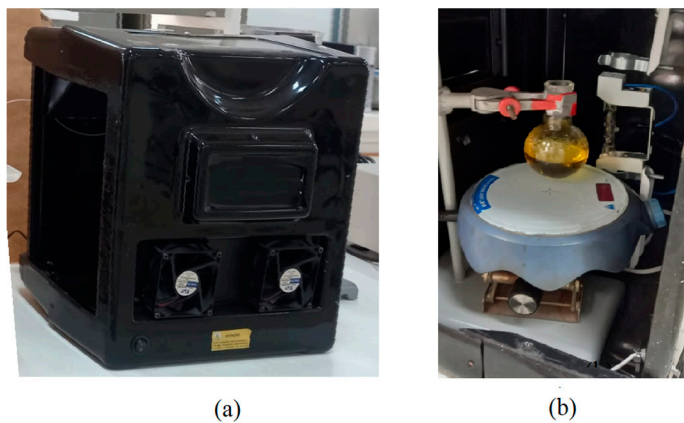

**Figure S2.** Photochemical chamber (a) external view and (b) view of the internal arrangement.

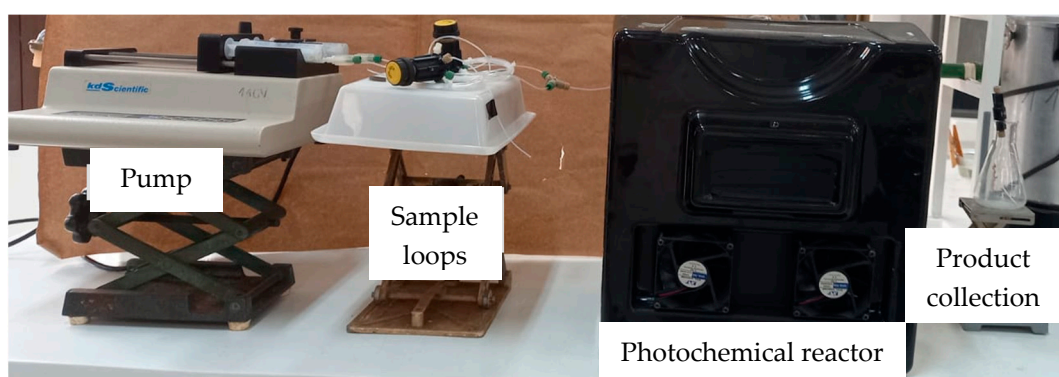

**Figure S3.** Continuous flow set-up.

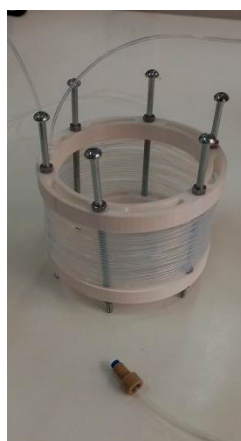

**Figure S4.** FEP photochemical reactor.

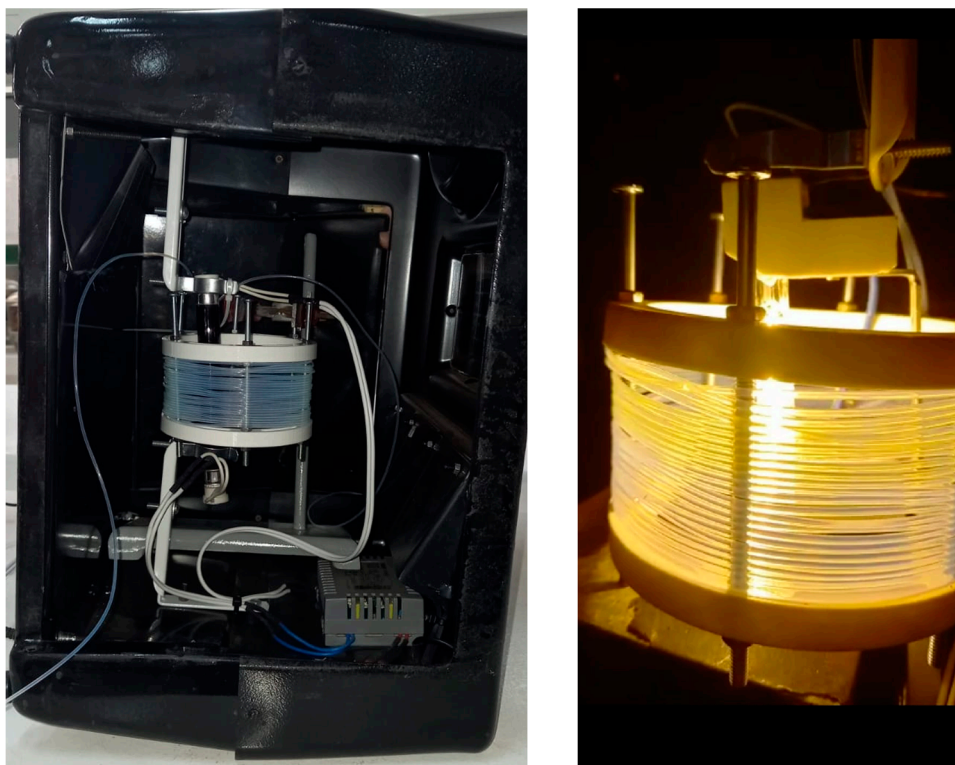

**Figure S5.** Continuous flow reactor - Left: reactor containing only solvent. Right: reactor during product **3a** synthesis.

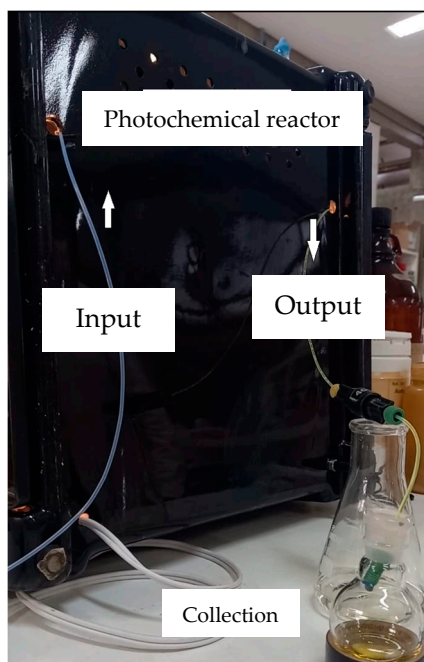

**Figure S6.** Input and output of the photochemical reactor during the synthesis of **3a**.

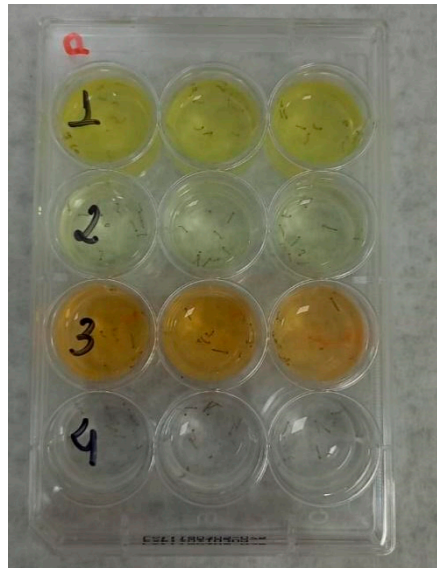

(a)

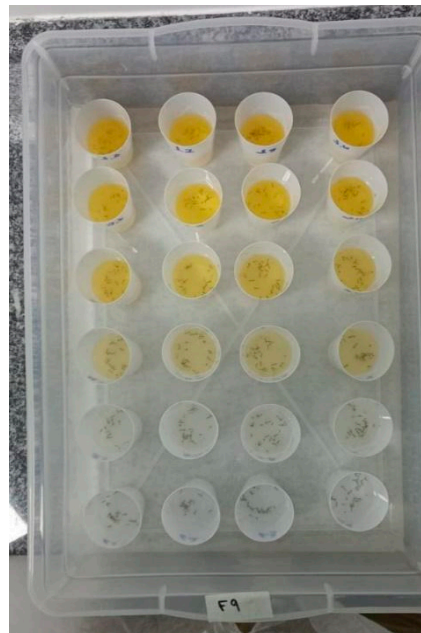

(b)

Larvicidal test on (a) a kesvi plate and (b) cups.

# Spectral Data

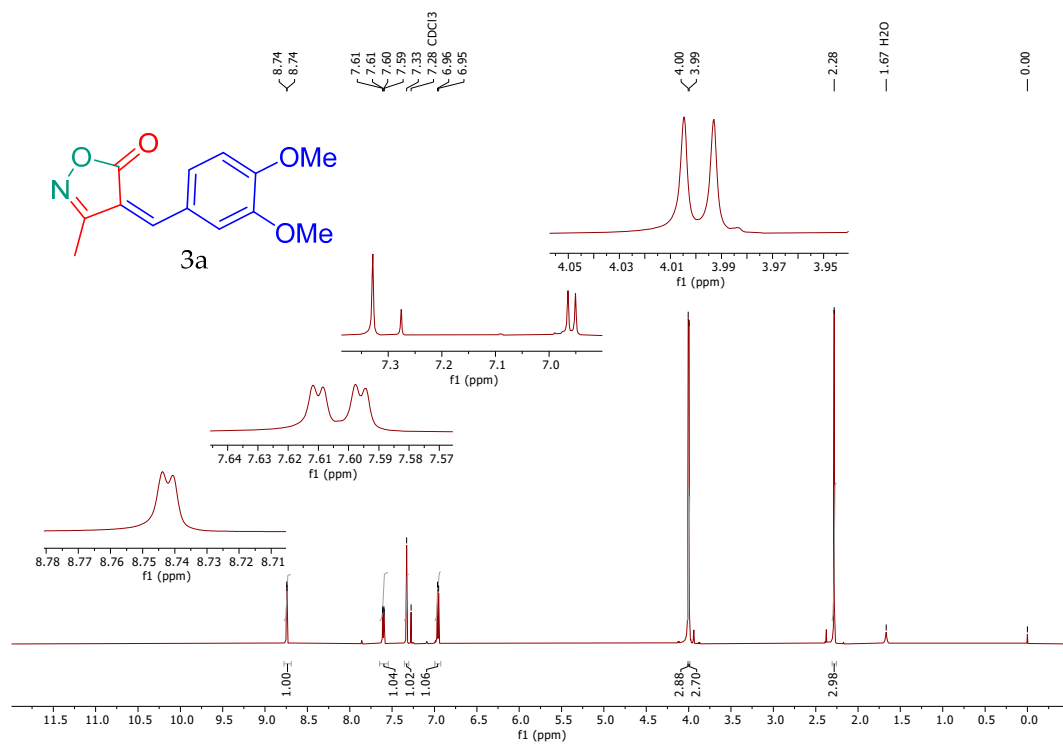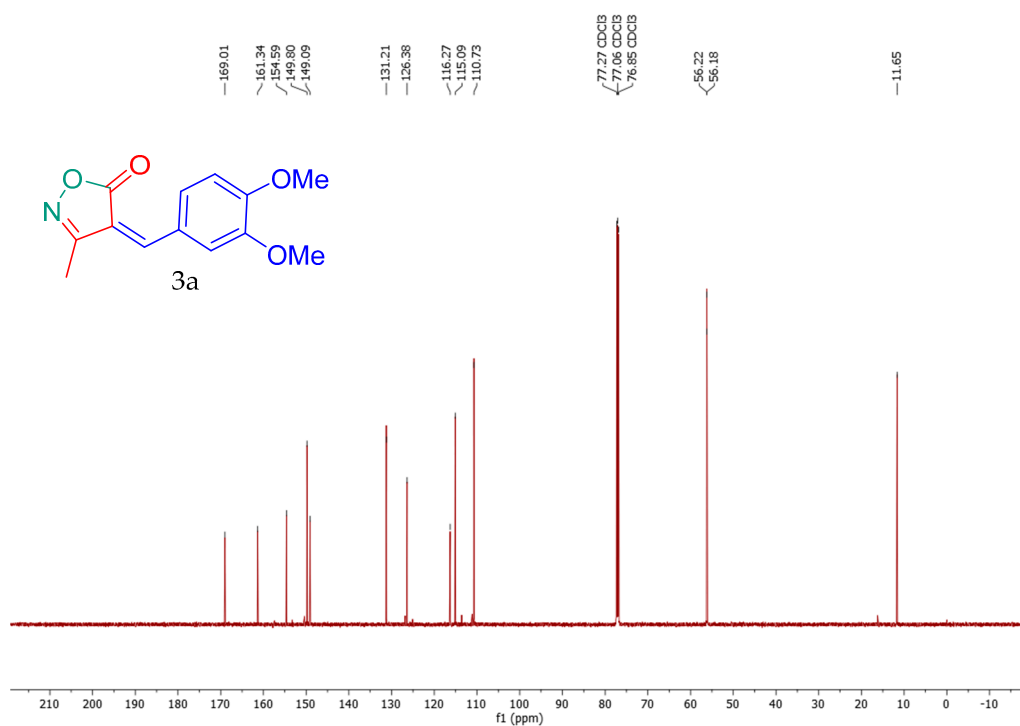

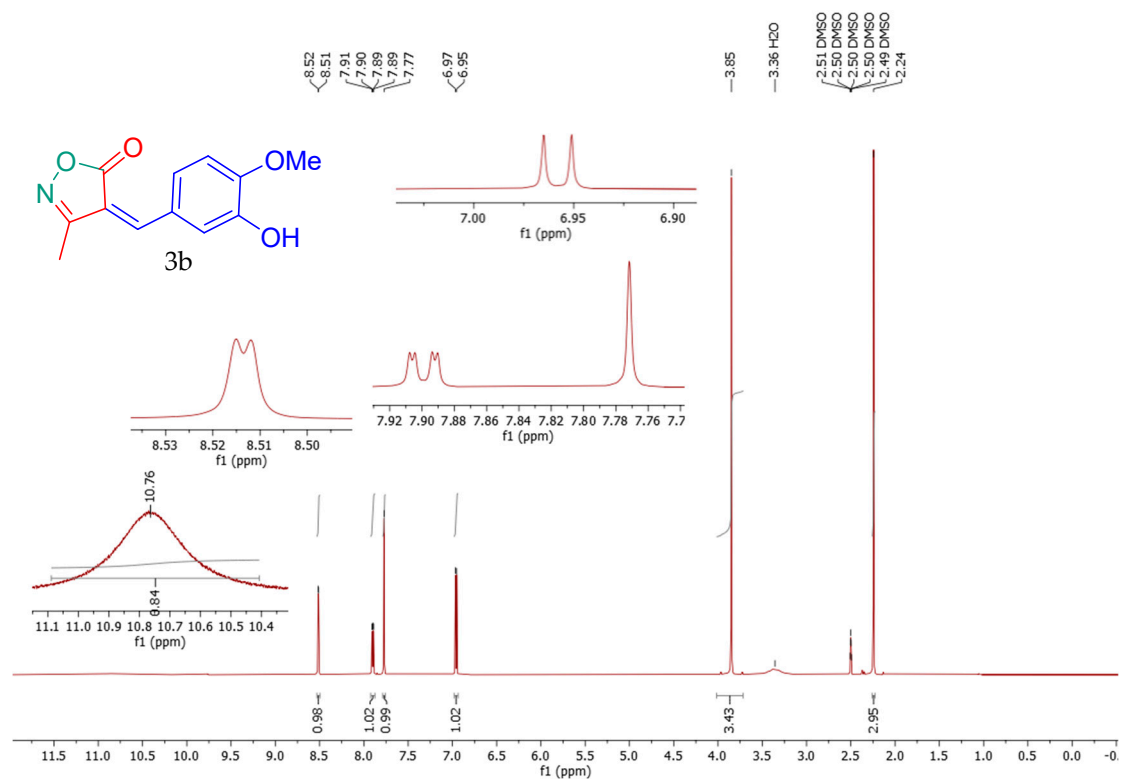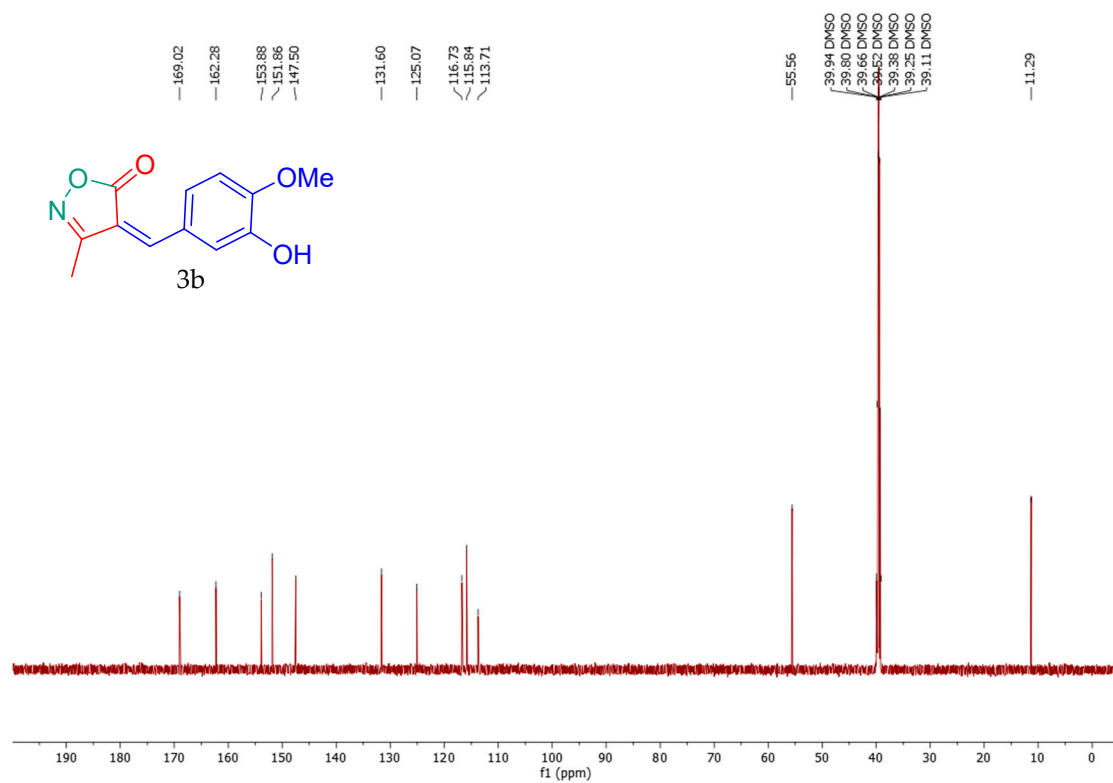

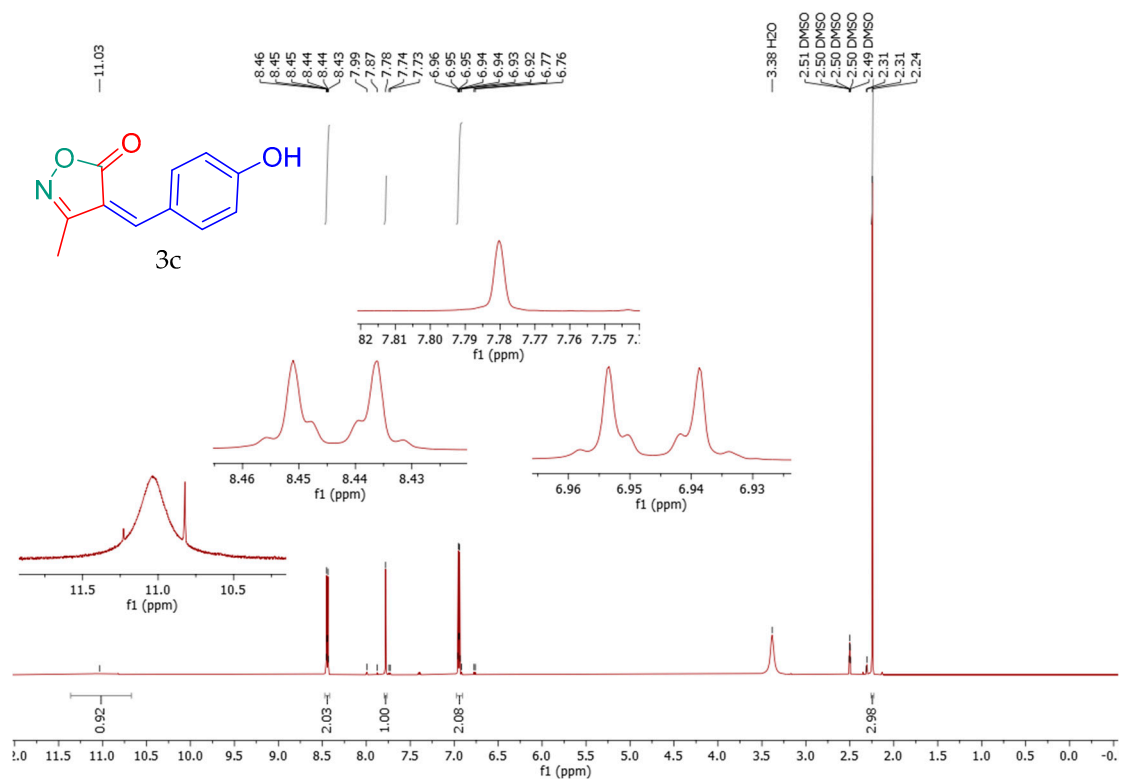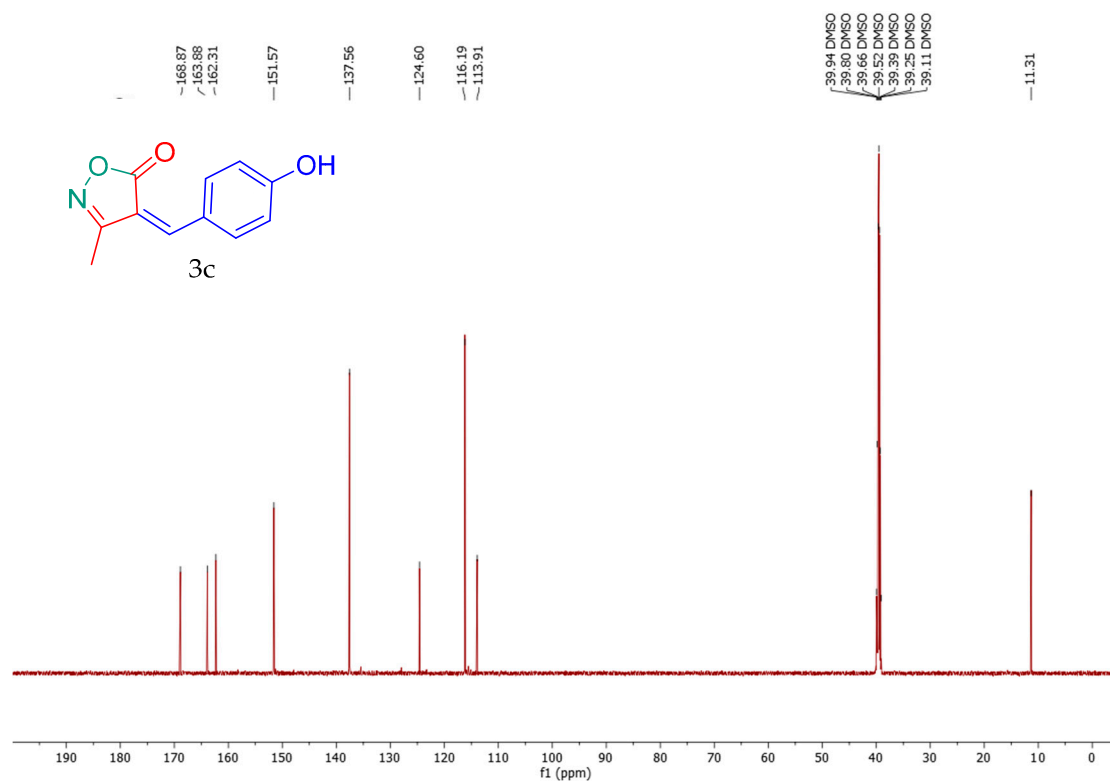



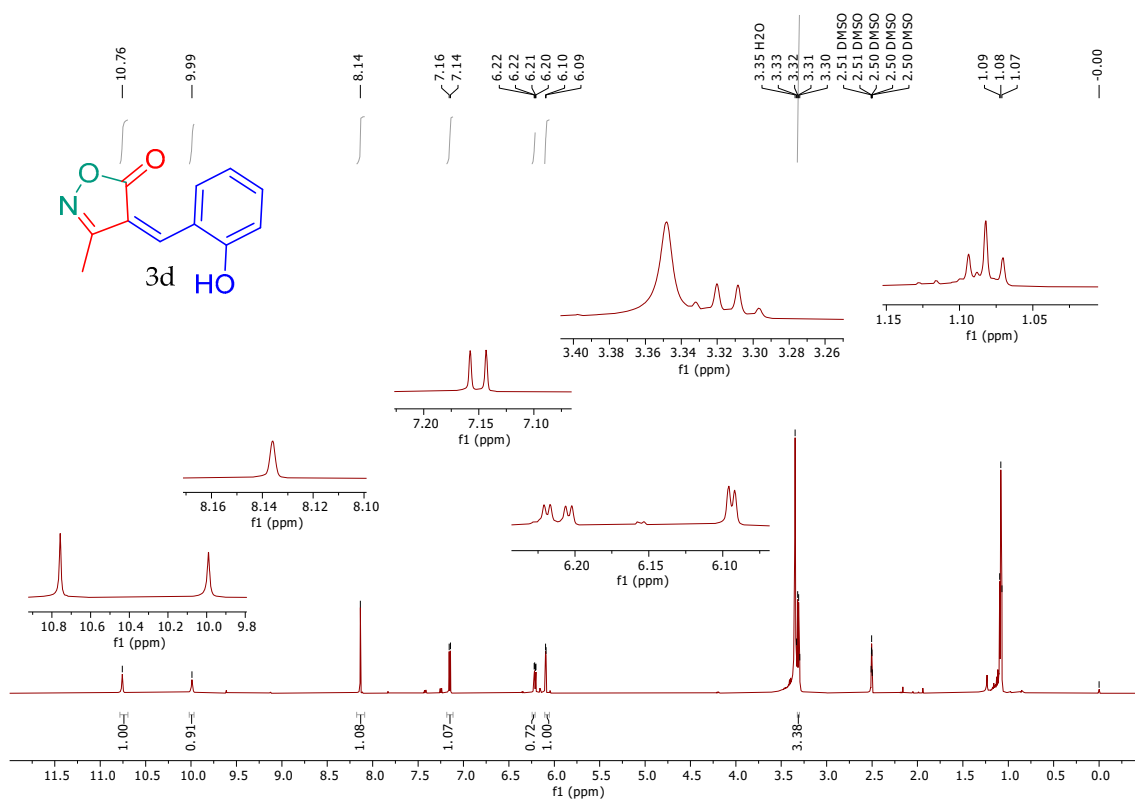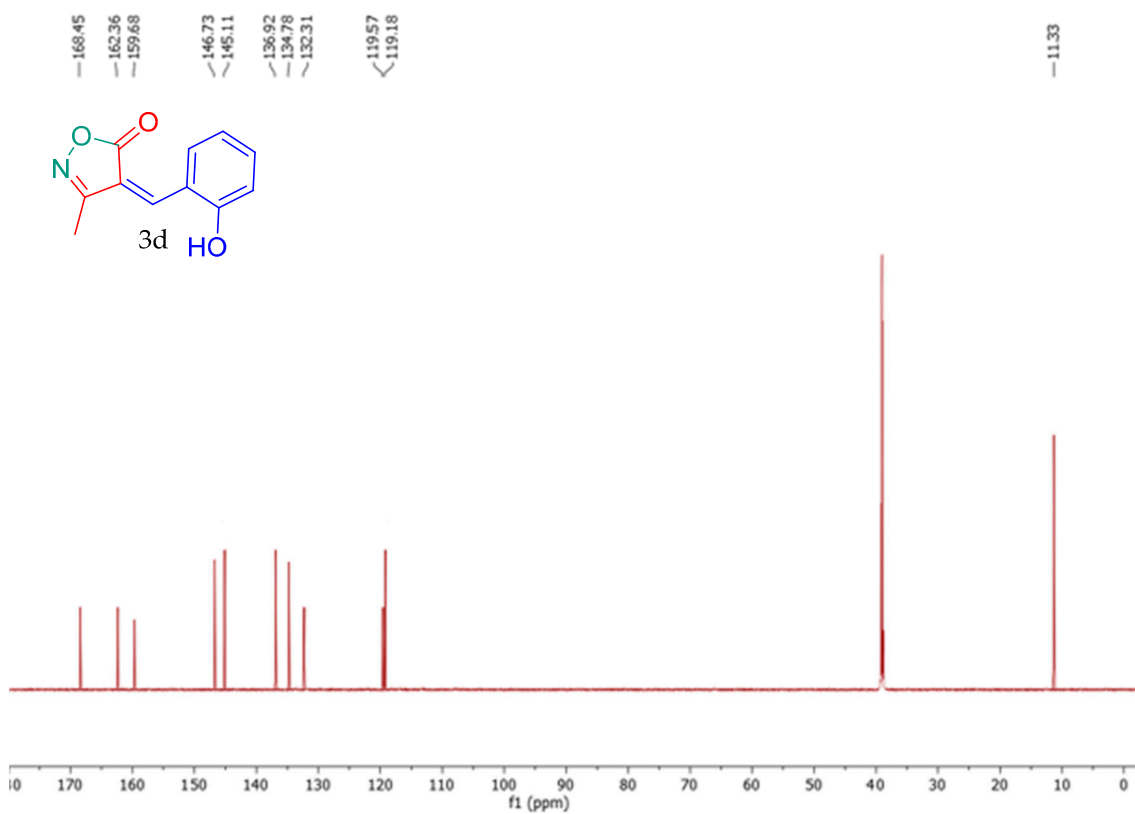



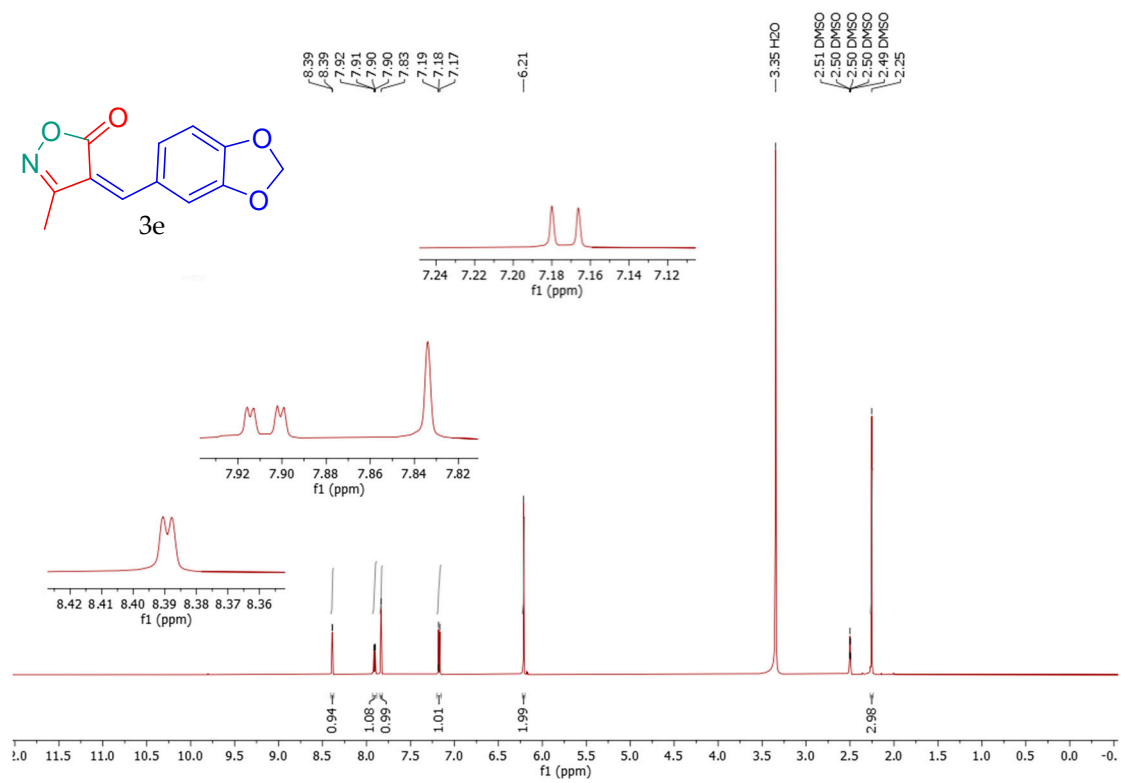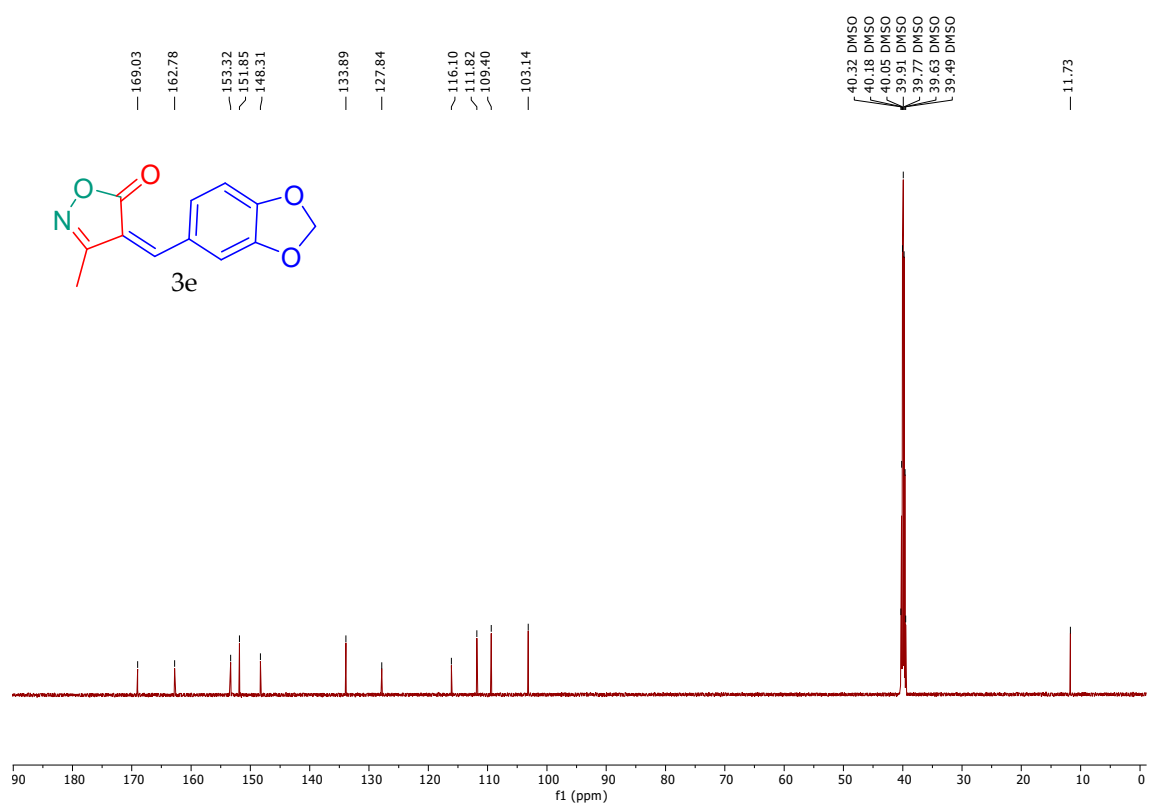

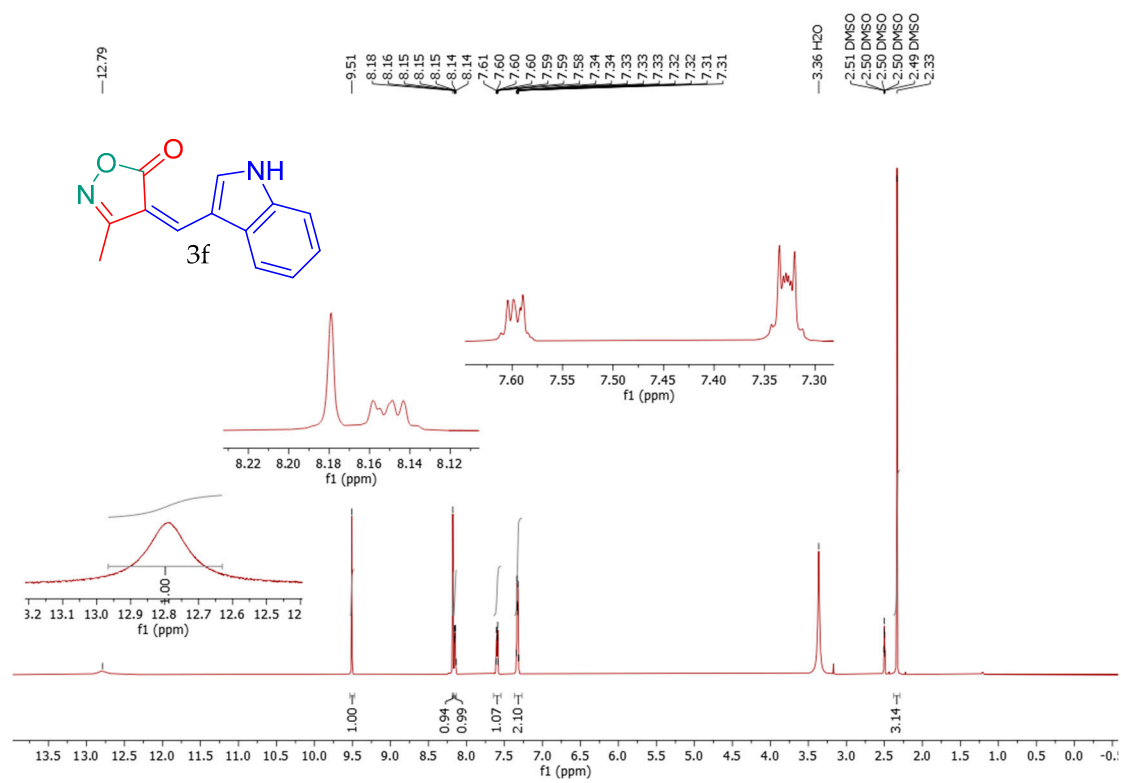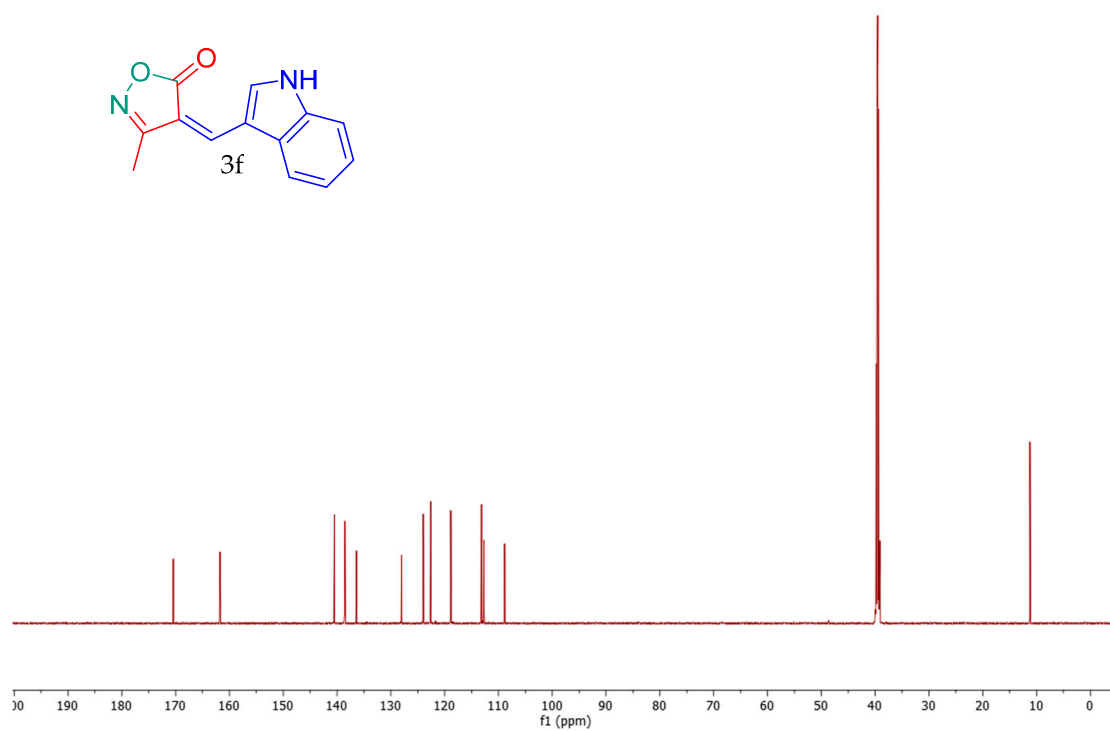

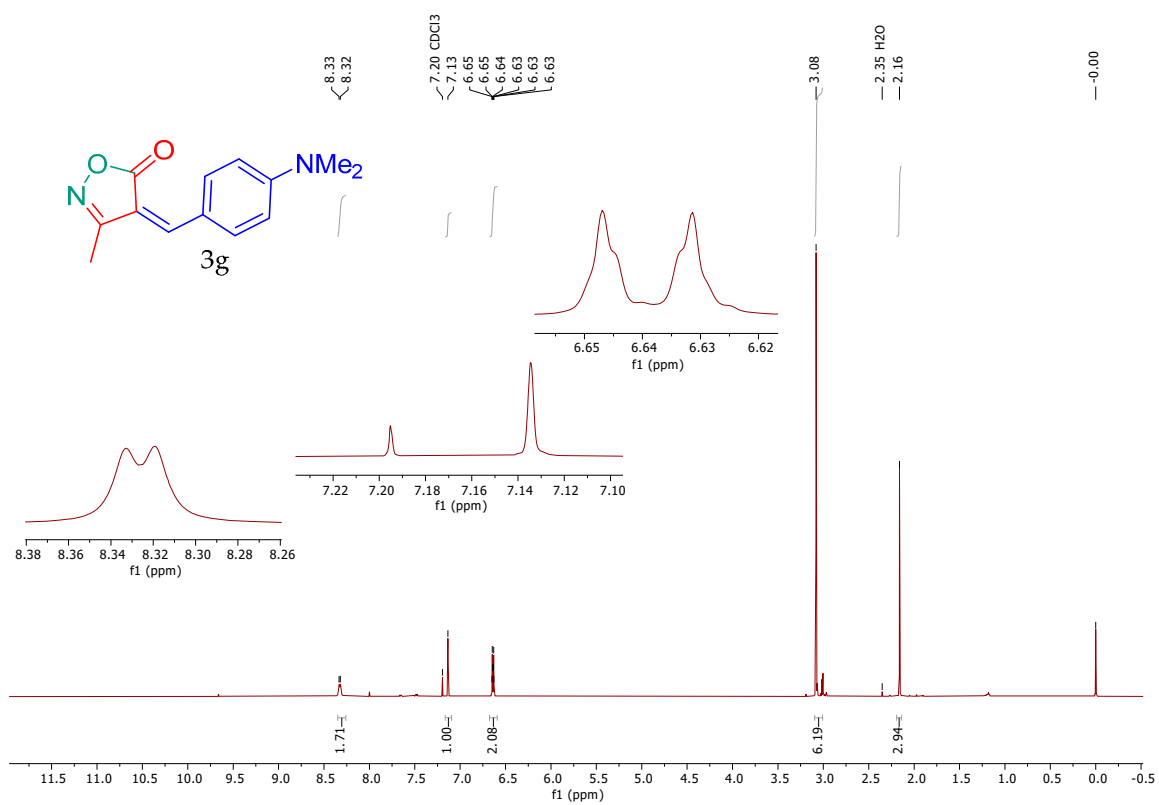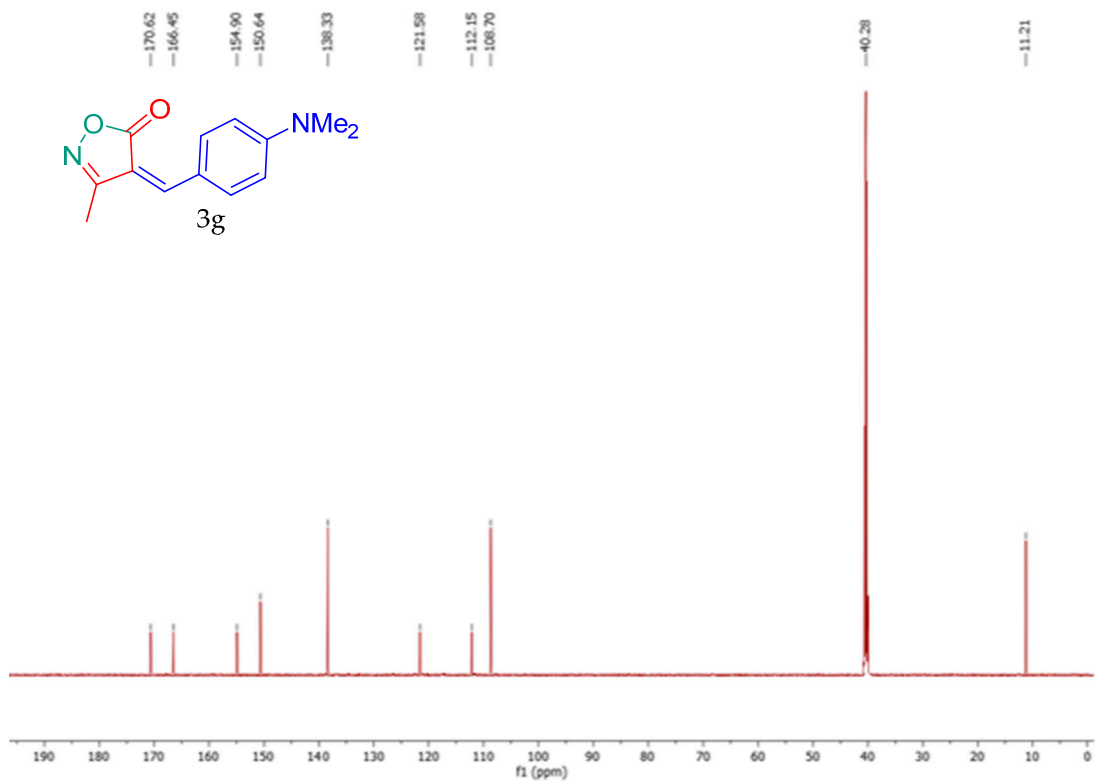

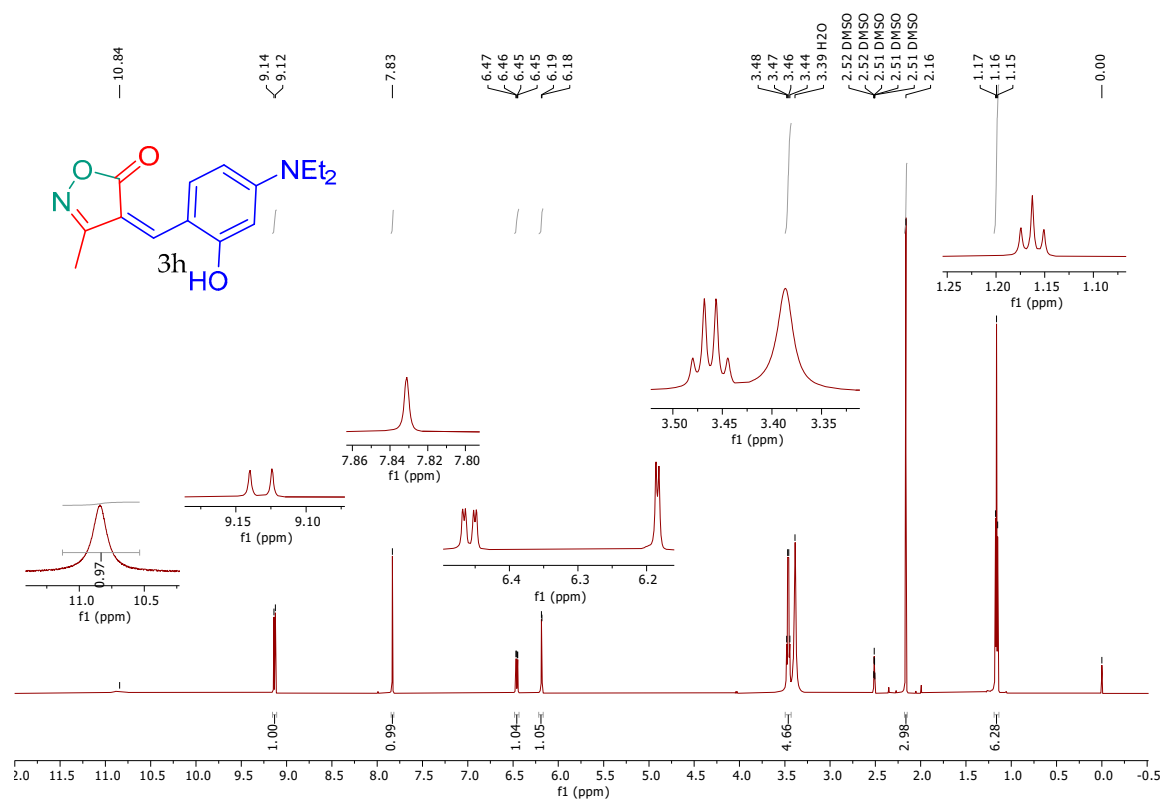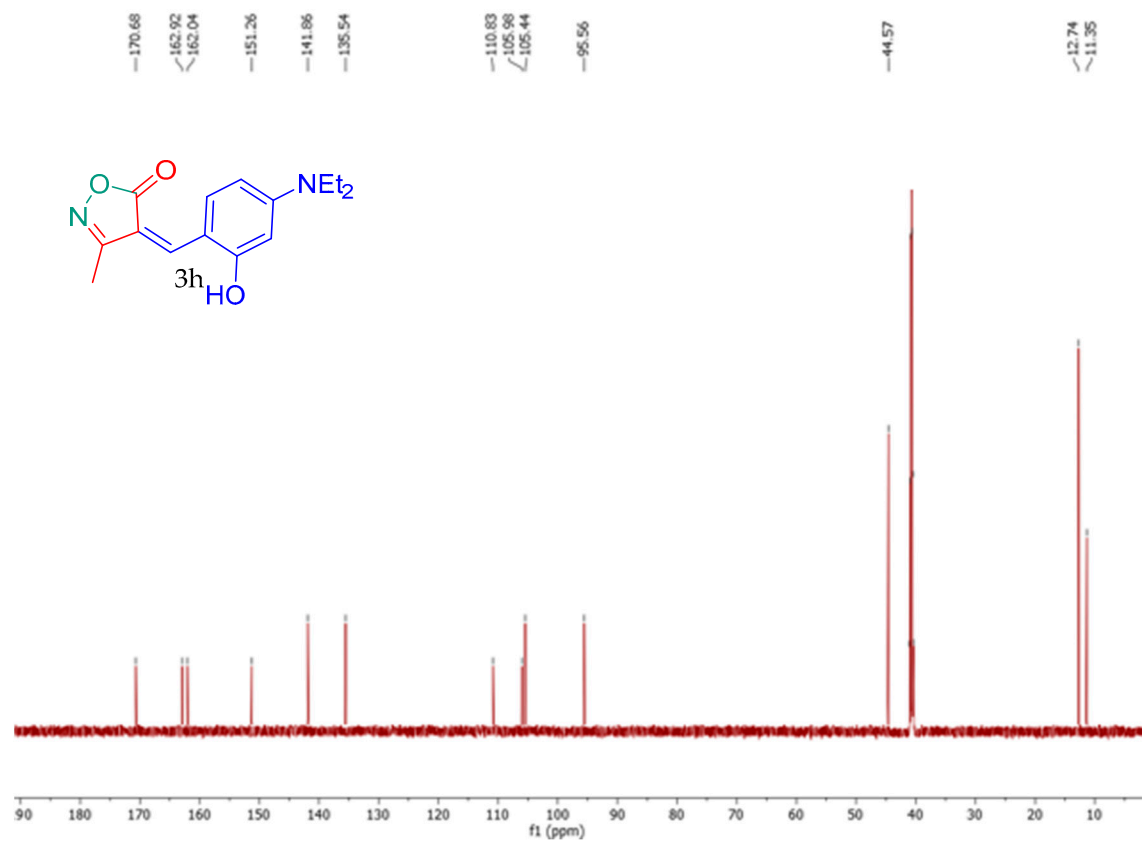

Supplement: s1 [file s1]
